# Supplementary material
Source: Springer Nature journal article supplement (https://www.springermedizin.de/resource/supplementary/12889_2013_6537_MOESM4_ESM.pdf/9498462)

Men

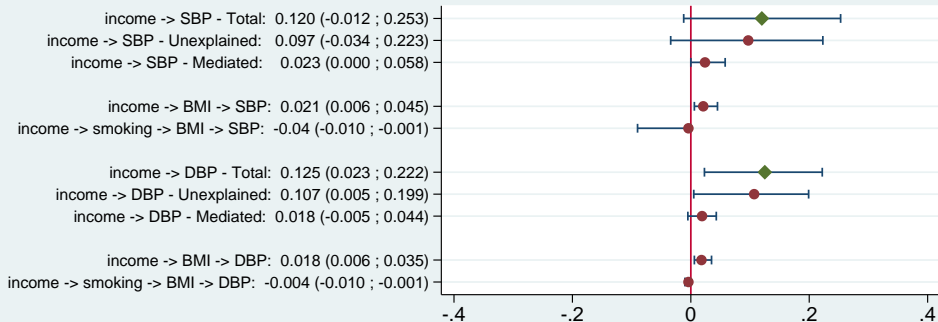

Women

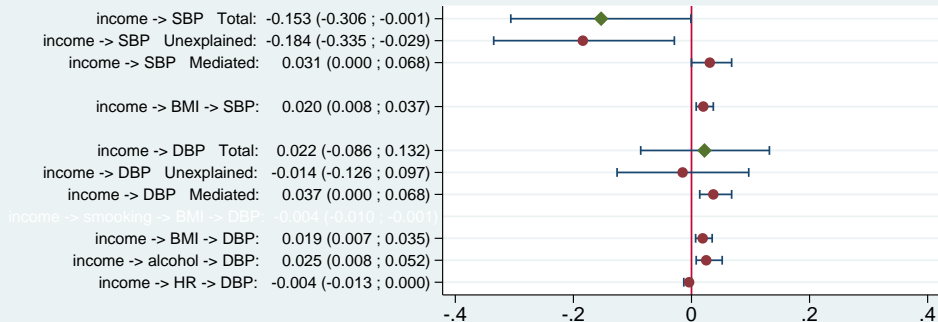

Supplement: MOESM4 [file 9498462]
